# Supplementary material
Source: PubMed Central journal article supplement (PMC6644002)
Supplement: ao6b00017_si_001.pdf [file ao6b00017_si_001.pdf]

# Enhancing Antibacterial Activity of Light-Activated Surfaces Containing Crystal Violet and ZnO nanoparticles: Investigation of Nanoparticle Size, Capping Ligand and Dopants

## Supporting Information

**Sandeep K. Sehmi,<sup>abc</sup> Sacha Noimark,<sup>d</sup> Sebastian D. Pike,<sup>e</sup> Joseph C. Bear,<sup>b</sup> William J. Peveler,<sup>b</sup> Charlotte K. Williams,<sup>e</sup> Milo S.P. Shaffer,<sup>e</sup> Elaine Allan,<sup>c</sup> Ivan P. Parkin<sup>b</sup> and Alexander J. MacRobert<sup>\*a</sup>**

<sup>a</sup>UCL Division of Surgery and Interventional Science, University College London, Royal Free Campus, Rowland Hill Street, London, NW3 2PF, UK. E-mail: a.macrobot@ucl.ac.uk

<sup>b</sup>Materials Chemistry Research Centre, Department of Chemistry, University College London, 20 Gordon Street, London, WC1H 0AJ, UK.

<sup>c</sup>Division of Microbial Disease, UCL Eastman Dental Institute, University College London, 256 Gray's Inn Road, London, WC1X 8LD, UK.

<sup>d</sup>Department of Medical Physics and Biomedical Engineering, University College London, Gower Street, London, WC1E 6BT, UK.

<sup>e</sup>Department of Chemistry, Imperial College London, Imperial College Road, London, SW7 2AZ, UK.

# Supporting Information

## 1. Experimental

### 1.1 Material characterisation

TEM micrographs and energy dispersive X-ray spectra (EDX) were taken using a Jeol 2100 HR-TEM with a LaB<sub>6</sub> source operating at an acceleration voltage of 200 kV with an Oxford Instruments XMax EDS detector running AZTEC software. TEM samples were prepared by drop-casting the nanoparticle suspension (in hexane) onto a 400 Cu mesh lacy carbon film TEM grid (Agar Scientific Ltd). Micrographs were recorded onto a Gatan Orius charge-coupled device and analysed using ImageJ software.

Elemental Analysis was determined by Stephen Boyer at London Metropolitan University.

X-ray diffraction (XRD): was performed using an X'Pert Pro diffractometer (PANalytical B. V., The Netherlands) and X'Pert Data Collector software, version 2.2b. The instrument was used in the theta/theta reflection mode, fitted with a nickel filter, 0.04 rad Soller slit, 10 mm mask, 1/4° fixed divergence slit, and 1/2° fixed antiscatter slit. The diffraction patterns were analysed using Fityk (version 0.9.0; Marcin Wojdyr, 2010): the peaks were fitted to a SplitPearson7 function, and the particle size was calculated using the fitted full-width half-maximum using the Scherrer Equation.

For leaching experiments Inductively Coupled Plasma - Optical Emission Spectroscopy (ICP-OES) analysis was conducted upon aqueous solutions (5 mL deionised water) in which a 1 cm<sup>2</sup> square of the modified polyurethane samples had been immersed for 2 hours or 2 days. The solutions were tested for [Zn] and [Mg], calibrating against stock solutions containing both Mg and Zn at 0.01, 0.1, 1 and 10 mg/mL and pure water. ICP-OES was measured on a Perkin Elmer Optima 2000 DV.

UV-vis absorption spectra of the modified polyurethane samples were taken using a Perkin Elmer Lambda 25 UV-vis spectrometer, within the range 300 – 700 nm (full range not shown). X-ray photoelectron spectroscopy (XPS) analysis of these samples were carried out using Thermo Scientific K-Alpha spectrometer using monochromated Al K $\alpha$  radiation. High resolution scans (0.1 eV) were collected at a pass energy of 50 eV, including the principal peaks of Zn (2p), Mg (1s), O (1s), N (1s) and C (1s). All binding energies were calibrated to the

C (1s) peak (284.5 eV). Water contact angle measurements obtained for all modified samples were prepared using a FTA 1000 Drop Shape Instrument. The average contact angle measurement over  $\geq 10$  measurements was calculated using a droplet of deionised water ( $\sim 5 \mu\text{L}$ ) dispensed by gravity from a gauge 30 needle, with a camera to photograph the samples side on. The data was analysed using FTA32 software. Polymers containing DOPA-capped nanoparticles were stored in a light box for an extended period of time to measure the photostability of CV when exposed to a white light emitting an average light intensity of  $2800 \pm 510$  lux at a distance of 33 cm from the samples).

## 2. Results

### 2.1 Energy dispersive X-ray

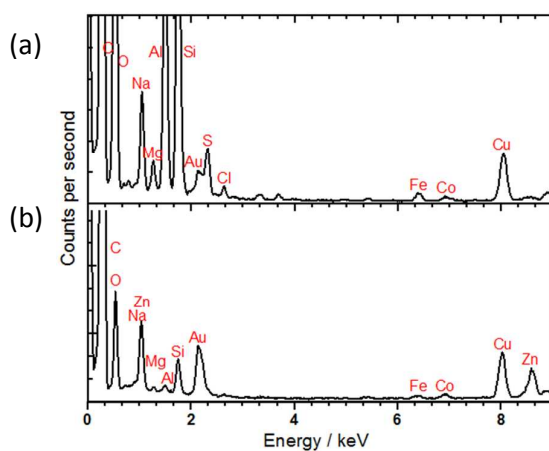

Figure S1 EDX spectrum of (a) MgO and (b) ZnMgO.

## 2.2 UV-vis absorbance spectroscopy analysis

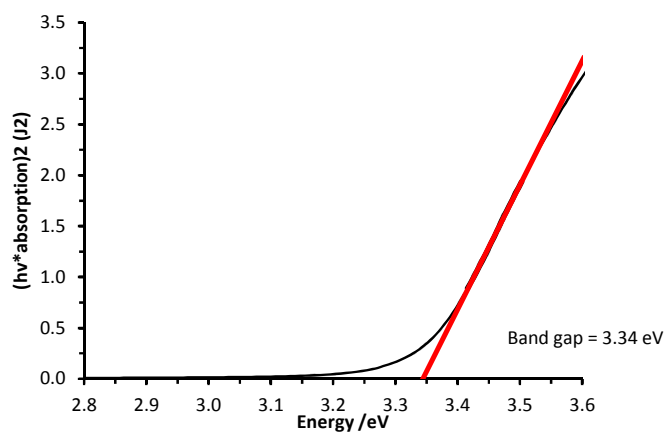

**Figure S2** Tauc plot to determine bandgap of ZnMgO capped with oleic acid (OA). The band onset was calculated as 3.34 eV.

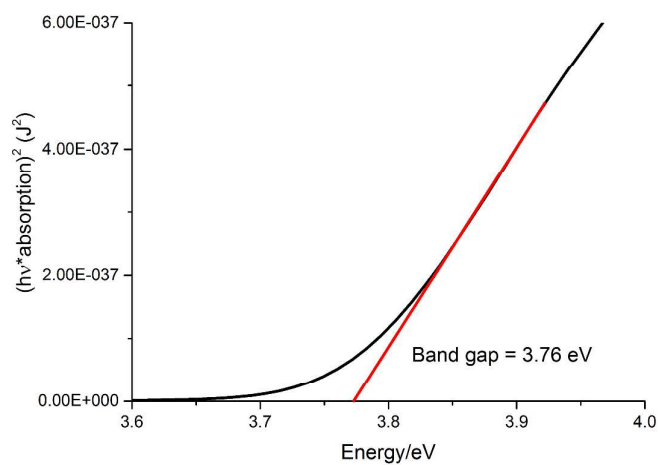

**Figure S3** Tauc plot to determine bandgap of ZnO capped with dioctylphosphinate (DOPA). The band onset was calculated as 3.76 eV.

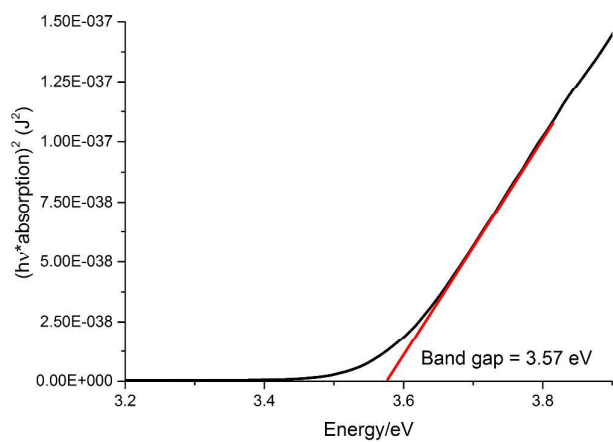

**Figure S4** Tauc plot to determine bandgap of ZnMgO capped with dioctylphosphinate (DOPA). The band onset was calculated as 3.57 eV.

### 2.3 X-ray diffraction

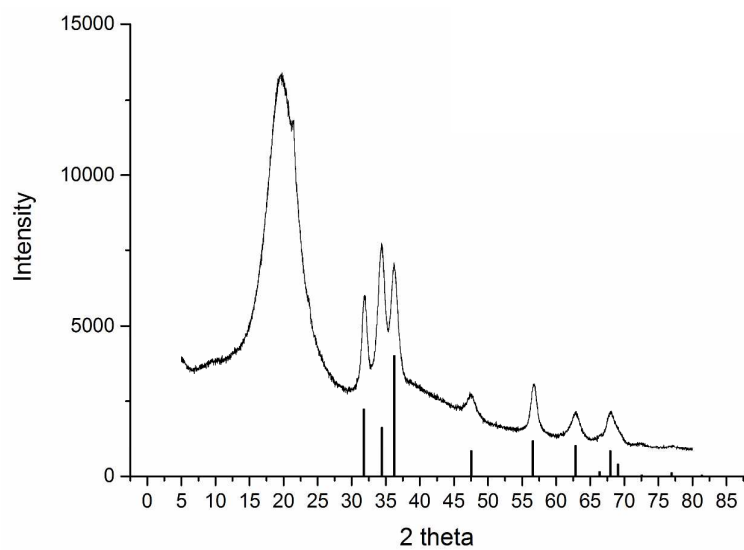

**Figure S5** XRD pattern for  $Zn_{0.9}Mg_{0.1}O_{OA}$ . Large peak at 2 theta  $\sim 20^\circ$  is from organic contaminants (likely to be excess oleic acid).

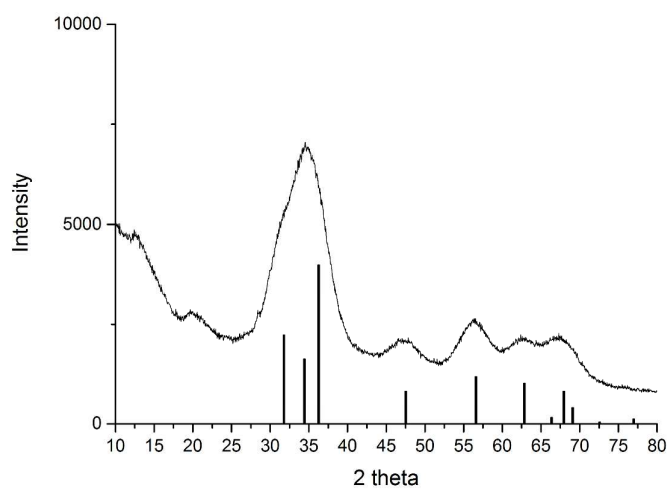

**Figure S6** XRD pattern for ZnO\_DOPA.

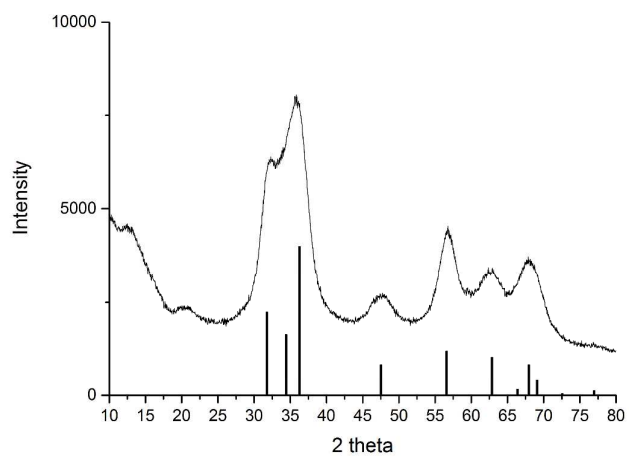

**Figure S7** XRD pattern for Zn<sub>0.9</sub>Mg<sub>0.1</sub>O\_DOPA.

## 2.4 UV-vis Absorption Spectroscopy

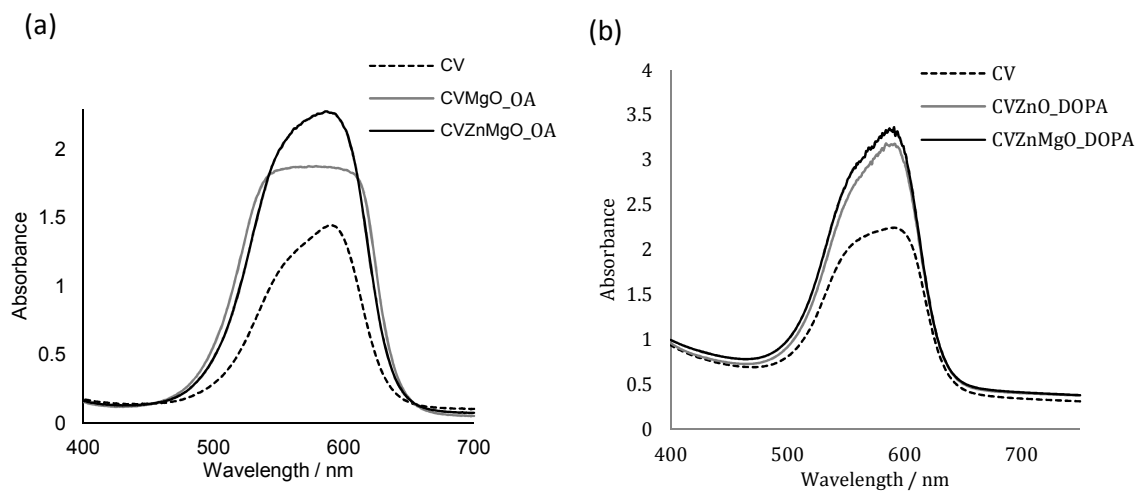

**Figure S8** UV-vis absorbance spectra measured in the range of 400 – 700 nm of samples used for microbiological investigation. (a) Samples incorporating oleic acid-capped ZnO: CV and ZnMgO encapsulated-polyurethane (CVZnMgO\_OA) and CV and MgO encapsulated-polyurethane (CVMgO\_OA). (b) Samples incorporating DOPA-capped ZnO: CV and ZnO-encapsulated polyurethane (CVZnO\_DOPA) and CV and ZnMgO-encapsulated polyurethane (CVZnMgO\_DOPA). CV indicates crystal violet-coated polyurethane.

## 2.5 X-ray Photoelectron Spectroscopy

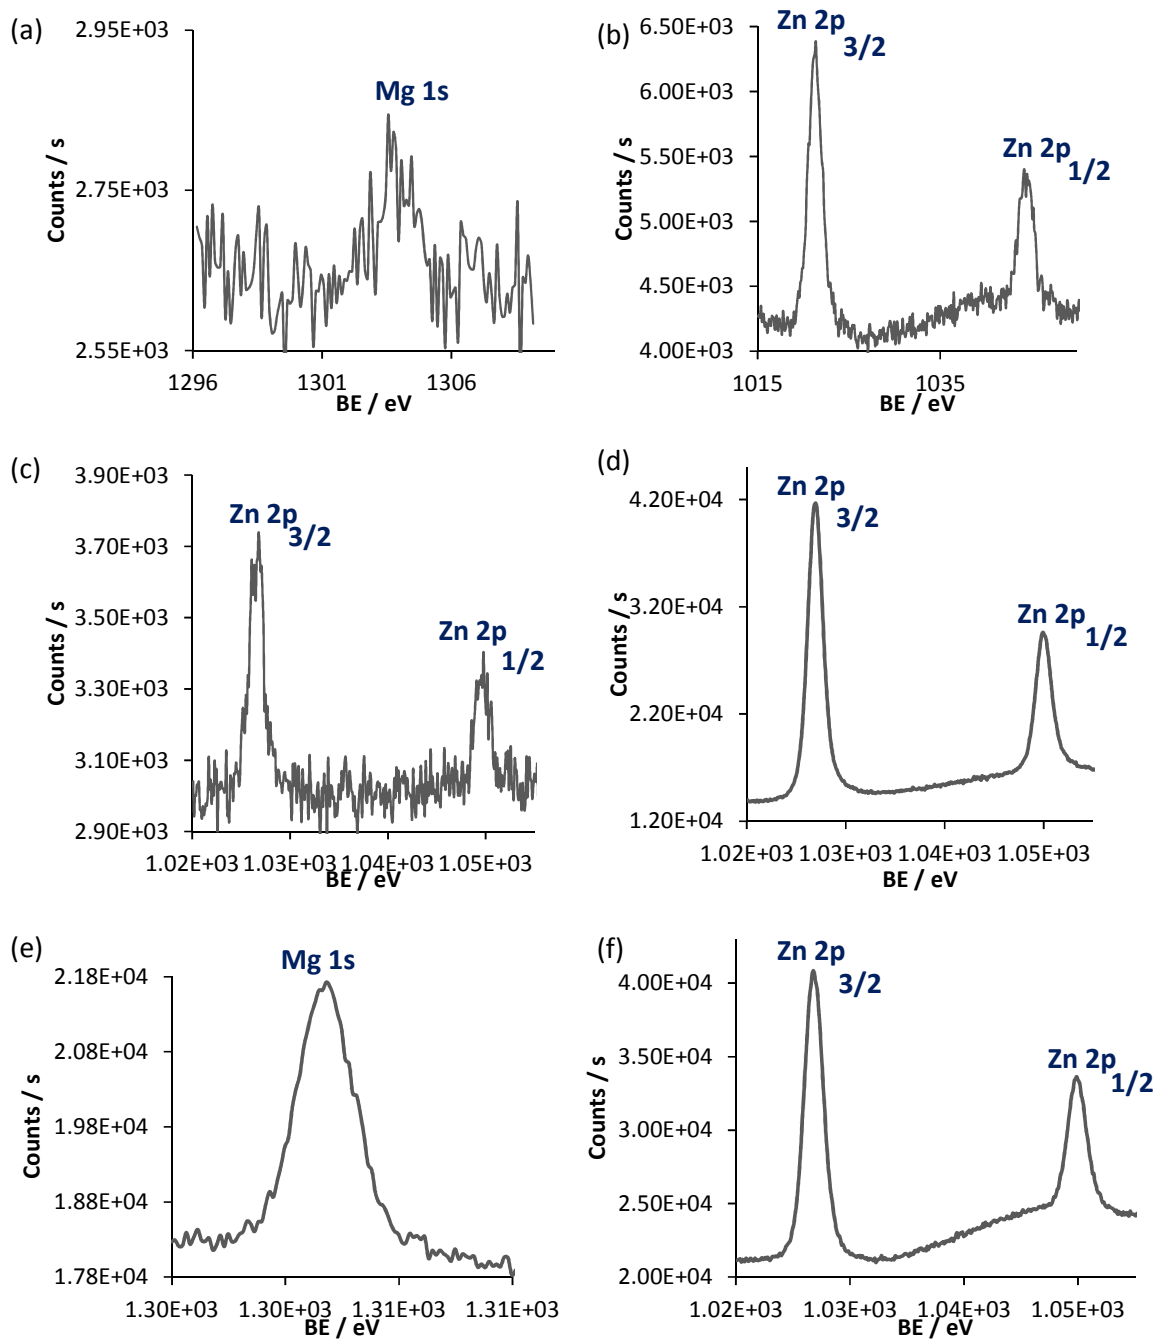

**Figure S9** XPS spectra for modified polymer samples: (a) Mg (1s) on CVMgO\_OA surface, (b) Zn (2p) on CVZnMgO\_OA surface, (c) Zn (2p) on CVZnMgO\_OA sputtered 50 s, (d) Zn (2p) on CVZnMgO\_DOPA 50 s, (e) Mg (1s) on CVZnMgO\_DOPA sputtered 50 s and (f) Zn (2p) on CVZnO\_DOPA sputtered 50 s.



## 2.6 Water Contact Angle measurements

| Polymer sample       | Contact angle (°) | Standard deviation |
|----------------------|-------------------|--------------------|
| Untreated            | 93                | ± 1.1              |
| Control (DCM/hexane) | 93                | ± 1.2              |
| MgO_OA               | 93                | ± 1.4              |
| ZnMgO_OA             | 97                | ± 0.5              |
| ZnMgO_DOPA           | 95                | ± 0.7              |
| ZnO_DOPA             | 99                | ± 0.4              |
| CV                   | 101               | ± 1.3              |
| Control (toluene)    | 94                | ± 0.8              |
| CVMgO_OA             | 93                | ± 0.5              |
| CVZnMgO_OA           | 97                | ± 1.4              |
| CVZnMgO_DOPA         | 98                | ± 0.7              |
| CVZnO_DOPA           | 95                | ± 1.0              |

**Table S1** Water contact angle measurements of samples used in the microbiological testing: untreated, control (treated with DCM and hexane, metal oxide nanoparticle-encapsulated (MgO\_OA / ZnMgO\_OA / ZnO\_DOPA / ZnMgO\_DOPA), control (treated with toluene), crystal violet-coated (CV), and crystal violet-coated and metal oxide nanoparticle-encapsulated (CVMgO\_OA / CVZnMgO\_OA / CVZnO\_DOPA / CVZnMgO\_DOPA).

## 2.7 Photostability of Polymer containing DOPA-capped Nanoparticles

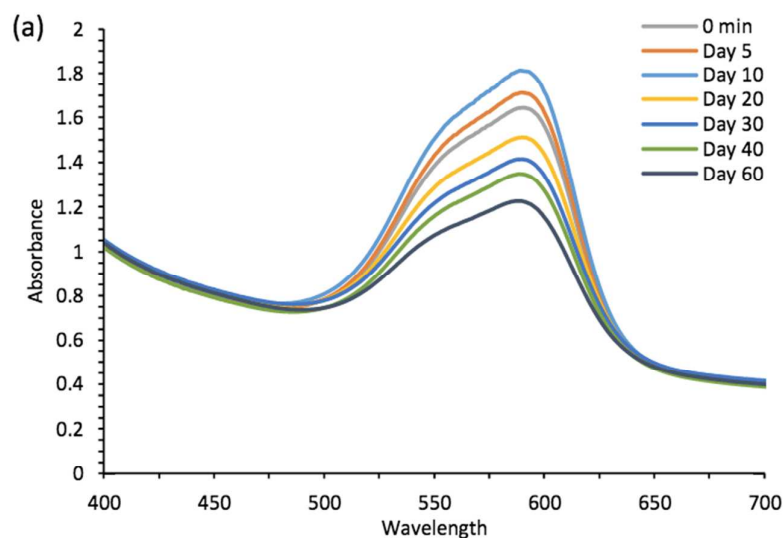

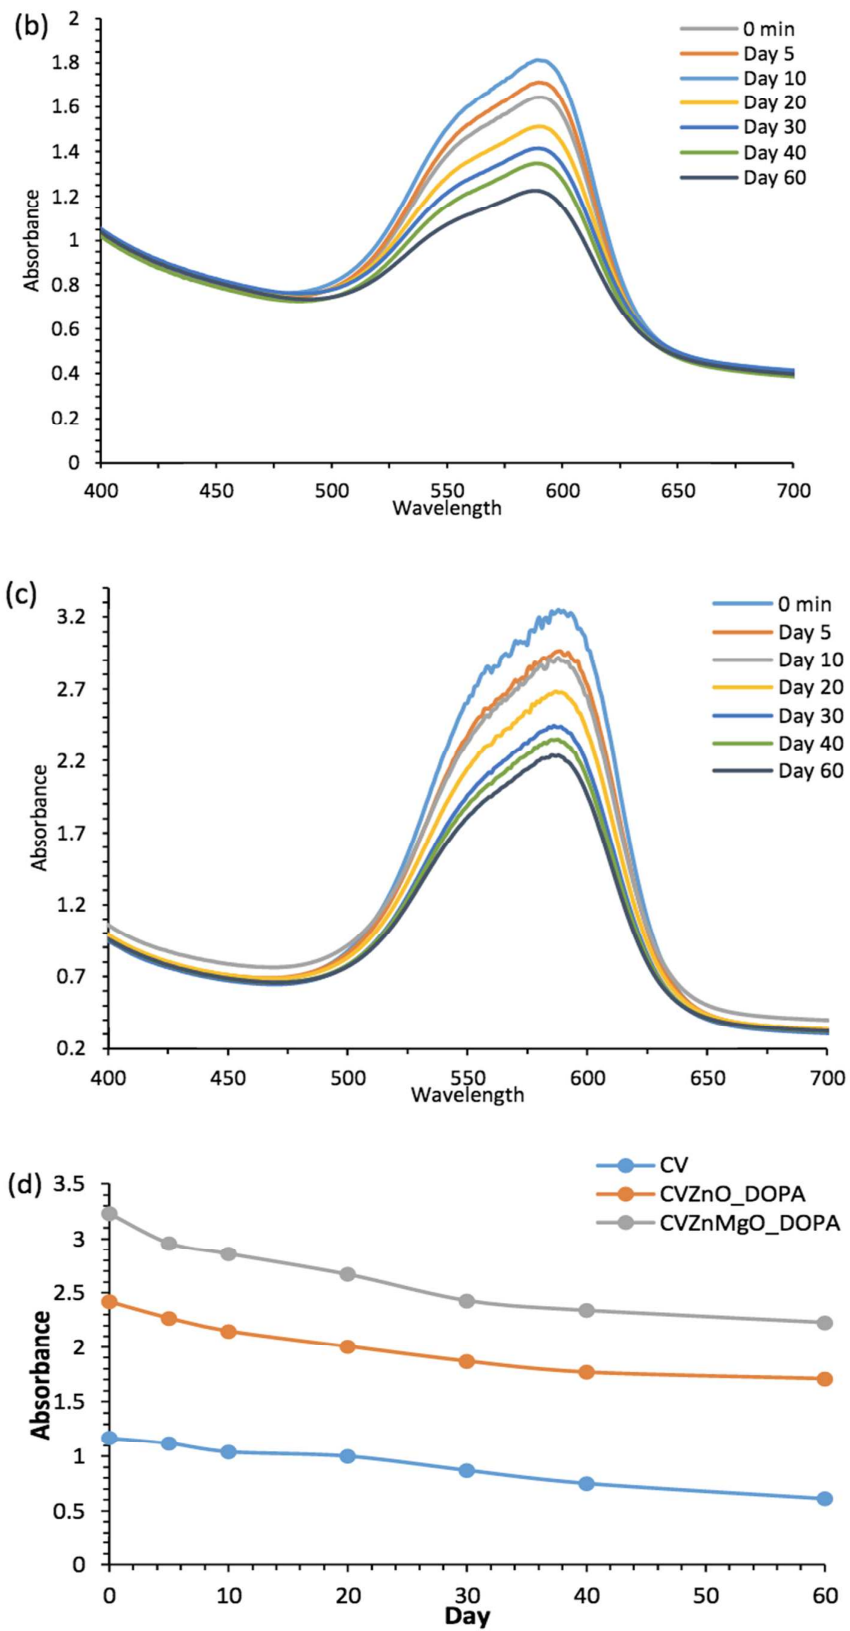

**Figure S10** UV-vis absorbance spectra of (a) crystal violet-coated (CV), (b) crystal violet and DOPA-capped ZnO-incorporated (CVZnO\_DOPA) and (c) crystal violet and DOPA-capped ZnMgO-incorporated (CVZnMgO\_DOPA)

polymers. The samples were exposed to a white light source emitting an average light intensity of  $3880 \pm 200$  lux at a distance of 33 cm from the samples. (d) The rate of photodegradation of the samples upon (60 days; 3880 lux) was displayed as a change in absorbance at the CV absorbance maxima over time. Data shown with control polymer readings subtracted.

## 2.8 Microbiological Investigation

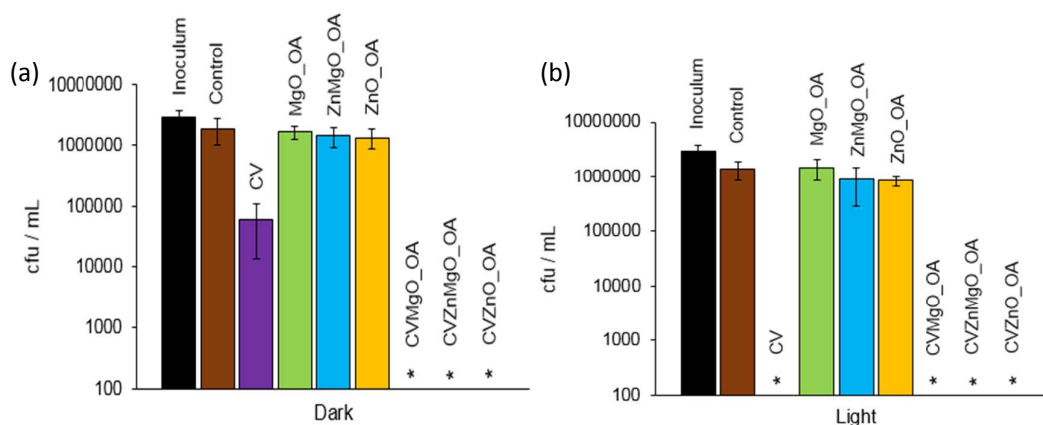

**Figure S11** Viable counts of *S. aureus* after incubation at 20°C on modified polyurethane squares for: (a) 2 h in the dark and (b) 2 h exposure to white light illumination with an average light intensity of  $6600 \pm 900$  lux at a distance of 25 cm from the samples. \* indicates bacterial counts were reduced to below the detection limit of 100 cfu/mL. OA indicates nanoparticles synthesised with an oleic acid capping. Error bars are based on the standard deviation of three experimental replicates.

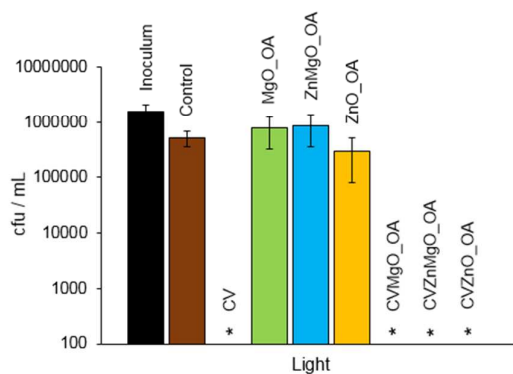

**Figure S12** Viable counts of *E. coli* after incubation at 20°C on modified polyurethane squares for 4 h exposure to white light illumination with an average light intensity of  $6600 \pm 900$  lux at a distance of 25 cm from the samples. \* indicates bacterial counts were reduced to below the detection limit of 100 cfu/mL. OA indicates nanoparticles synthesised with an oleic acid capping. Error bars are based on the standard deviation of three experimental replicates.

## Leaching study

1 cm<sup>2</sup> polyurethane squares impregnated with NPs were placed in 2 mL of de-ionised water for periods of 2 hours or 2 days. After removal of the polymer sample the aqueous solutions were diluted to 5 mL and analysed by ICP-OES for [Zn] and [Mg] against calibration curves for Mg and Zn.

| ICP results       | SD = standard deviation, all data in mg/L |        |              |        |              |        |              |        |
|-------------------|-------------------------------------------|--------|--------------|--------|--------------|--------|--------------|--------|
|                   | 2 hours                                   |        |              |        | 2 days       |        |              |        |
|                   | [Zn]                                      | SD     | [Mg]         | SD     | [Zn]         | SD     | [Mg]         | SD     |
| <u>ZnO DOPA</u>   | <b>0.083</b>                              | 0.001  | <b>0.003</b> | 0.0003 | <b>0.169</b> | 0.005  | <b>0.004</b> | 0.003  |
| <u>ZnMgO DOPA</u> | <b>0.081</b>                              | 0.001  | <b>0.009</b> | 0      | <b>0.268</b> | 0.0004 | <b>0.008</b> | 0.0002 |
| <u>ZnO OA</u>     | <b>0.132</b>                              | 0.0002 | <b>0.002</b> | 0.0003 | <b>1.696</b> | 0.017  | <b>0.006</b> | 0.0003 |
| <u>ZnMgO OA</u>   | <b>0.095</b>                              | 0.001  | <b>0.009</b> | 0.001  | <b>0.337</b> | 0.004  | <b>0.01</b>  | 0.0001 |
| <u>MgO OA</u>     | <b>0.012</b>                              | 0.002  | <b>0.027</b> | 0.001  | <b>0.026</b> | 0.003  | <b>0.03</b>  | 0.0002 |

**Table S2** Amount of leaching (mg/L) of Zn<sup>2+</sup> and/or Mg<sup>2+</sup> ions from modified polymer samples after 2 hours and 2 days.

## Calculation of DOPA surface coverage of small ZnO/ZnMgO nanoparticles

Both ZnO@DOPA and ZnMgO@DOPA nanoparticle samples were analysed by elemental analysis (EA) and thermogravimetric analysis (TGA) to determine the ligand content.

ZnO@DOPA. C% by elemental analysis = 25.3% , loss of alkyl chains by TGA = 29 wt%

Estimated metal:ligand ratio from EA = 5.8:1, from TGA = 5.9:1

ZnMgO@DOPA. C% by elemental analysis = 25.4%, loss of alkyl chains by TGA = 32 wt %

Estimated metal:ligand ratio from EA ~ 6:1, from TGA = 5.4:1

From the sizes established by XRD analysis and these ratios an estimate of the ligand coverage can be made.

To calculate the amount of ligand required to fully coat a nanoparticle surface certain assumptions were used:

1. The nanoparticles are perfectly spherical
2. The density ( $\rho$ ) of the particles matches that of the bulk phase material (e.g.  $\rho(\text{ZnO}) = 5.61 \text{ g/cm}^3$  and density  $\rho(\text{Zn}_{0.9}\text{Mg}_{0.1}\text{O}) \sim 5.33$  by replacement of 10% Zn by Mg in the same structure)

3. The ZnO particles are pure ZnO (with no accounting for substoichiometric oxygen or dangling bonds)

4. The ligands pack perfectly across the surface with a contact area (C.A.) of 0.244 nm<sup>2</sup> for DOPA.<sup>1</sup>

Using these assumptions the surface area and volume of a nanoparticle was calculated:

$$S.A. = 4\pi r^2 \text{ (} r = \text{radius of nanoparticle)}$$

$$\text{Vol} = \frac{4}{3}\pi r^3$$

From the volume and density the no. of metal atoms (moles) was determined:

$$n_{\text{metal}} = \text{vol} \times \rho / m \text{ (where } m = \text{atomic mass of subunit eg. Cu or ZnO)}$$

From the surface area the number of ligands (moles) required for full coverage was determined:

$$n_{\text{ligand}} = S.A. / C.A._{\text{ligand}}$$

The ratio of these two values gives the required metal to ligand ratio for full coverage.

e.g. for a ZnO NP of  $r = 1.1$  nm,  $n_{\text{metal}} = 3.75 \times 10^{-22}$  (225 ZnO units) and  $n_{\text{ligand}} = 1.03 \times 10^{-22}$  (62 ligands) for DOPA. Therefore a metal:ligand ratio of 3.6:1 is required for complete coverage of a  $d = 2.2$  nm ZnO particle.

*The empirically calculated 6:1 ratio corresponds to a 60% coverage of the ZnO surface.*

e.g. for a Zn<sub>0.9</sub>Mg<sub>0.1</sub>O NP of  $r = 1.4$  nm,  $n_{\text{metal}} = 7.93 \times 10^{-22}$  (477 MO units) and  $n_{\text{ligand}} = 1.68 \times 10^{-22}$  (101 ligands) for DOPA. Therefore a metal:ligand ratio of 4.7:1 is required for complete coverage of a  $d = 2.8$  nm ZnMgO particle.

*The empirically calculated 6:1 ratio corresponds to a 78% coverage of the ZnO surface.*

## References

1. Cooper, R.J.; Camp, P.J.; Henderson, D.K.; Lovatt, P.A.; Nation, D.A.; Richards, S.; Tasker, P.A. The binding of phosphonic acids at aluminium oxide surfaces and correlation with passivation of aluminium flake. *Dalton Trans.*, **2007**, 10, 1300.
